# Supplementary material for: Magnetic properties of all-carbon graphene-fullerene nanobuds
Source: Royal Society of Chemistry journal article supplement (doi:10.1039/c0cp02433c), 2011-01-01
Supplement: c0cp02433c.pdf [file c0cp02433c.pdf]

## Supplementary Information

### Magnetic properties in all-carbon graphene-fullerene nanobuds

Min Wang, Chang Ming Li\*

School of Chemical and Biomedical Engineering, Nanyang Technological University, 70 Nanyang Drive, Singapore 637457

Center for Advanced Bionanosystems, Nanyang Technological University, 70 Nanyang Drive, Singapore 637457

\*Corresponding author. Tel: +65 67904485; Fax: +65 67911761. Email: ecml@ntu.edu.sg.

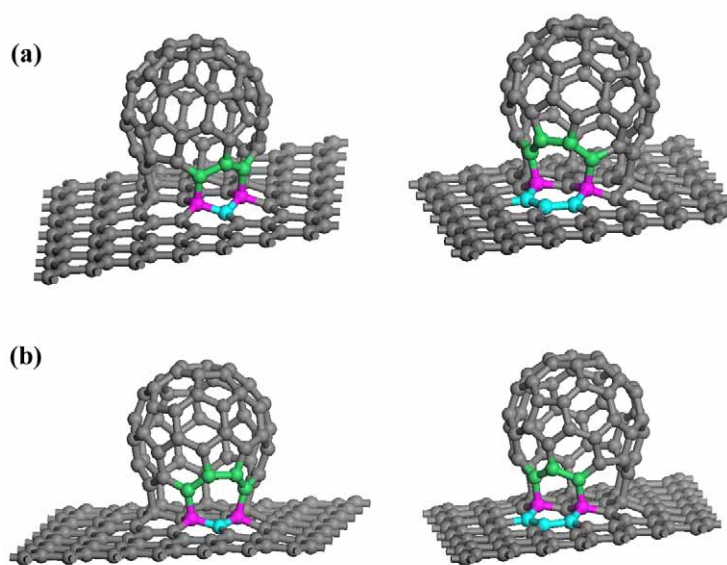

**Fig. S 1** Geometric structures of (a) Case A and (b) Case B. The green colored atoms of fullerene, pink associated atoms and cyan atoms of graphene exhibit (a) six- and nine- membered rings for Case A; and (b) seven- and eight- membered rings for Case B.

**Table S. 1** The energy data of four kinds of nanobuds : NM, AFM, FM and the related formation reactions. The binding energy  $E_b$  is defined as  $E_{\text{nanobuds}} - E_{\text{C54}} - E_{\text{graphene}}$ , where  $E_{\text{nanobuds}}$ ,  $E_{\text{C54}}$ , and  $E_{\text{graphene}}$  are the energies of nanobud, **isolated open cage C<sub>54</sub>**, and graphene, respectively. The energy differences of AFM and FM states are compared with corresponding NM ones.

| Case | $E_{\text{NM}}$<br>(meV/per atom) | $E_{\text{AFM}}$<br>(meV/ per atom) | $E_{\text{FM}}$<br>(meV/per atom) | $E_{\text{b}}$<br>(meV /per atom) |
|------|-----------------------------------|-------------------------------------|-----------------------------------|-----------------------------------|
| A    | 0.0<br>(-154969.8)                | -2.2<br>(-154972.0)                 | -4.0<br>(-154973.8)               | -67.2                             |
| B    | 0.0<br>(-154974.1)                | -0.6<br>(-154974.7)                 | -2.5<br>(-154976.6)               | -70.0                             |
| C    | 0.0<br>(-154997.1)                | 0.7<br>(-154996.4)                  | 0.7<br>(-154996.4)                | -90.5                             |
| D    | 0.0<br>(-155003.5)                | 0.3<br>(-155003.2)                  | 0.3<br>(-155003.2)                | -96.8                             |

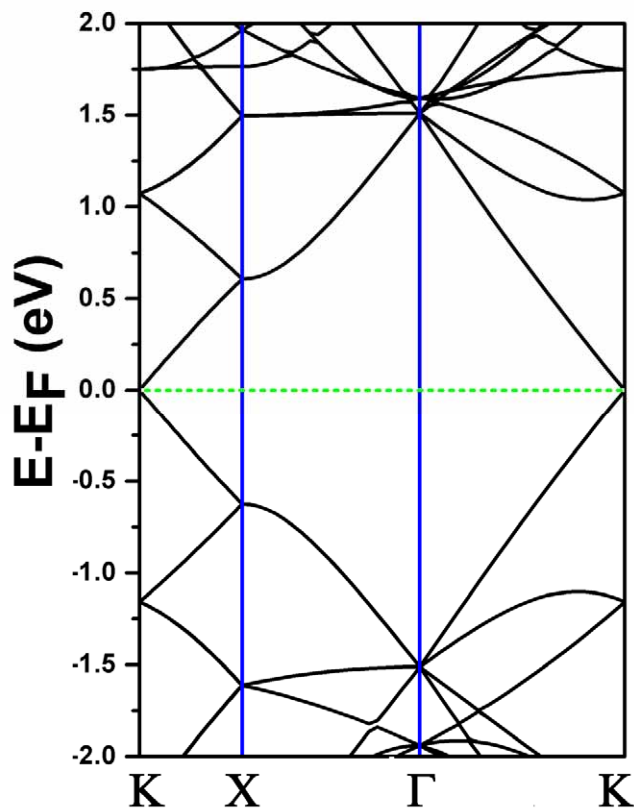

**Fig. S 2** Non spin-polarized band structure in 49-unit-cell graphene. The Fermi energy is set to zero.

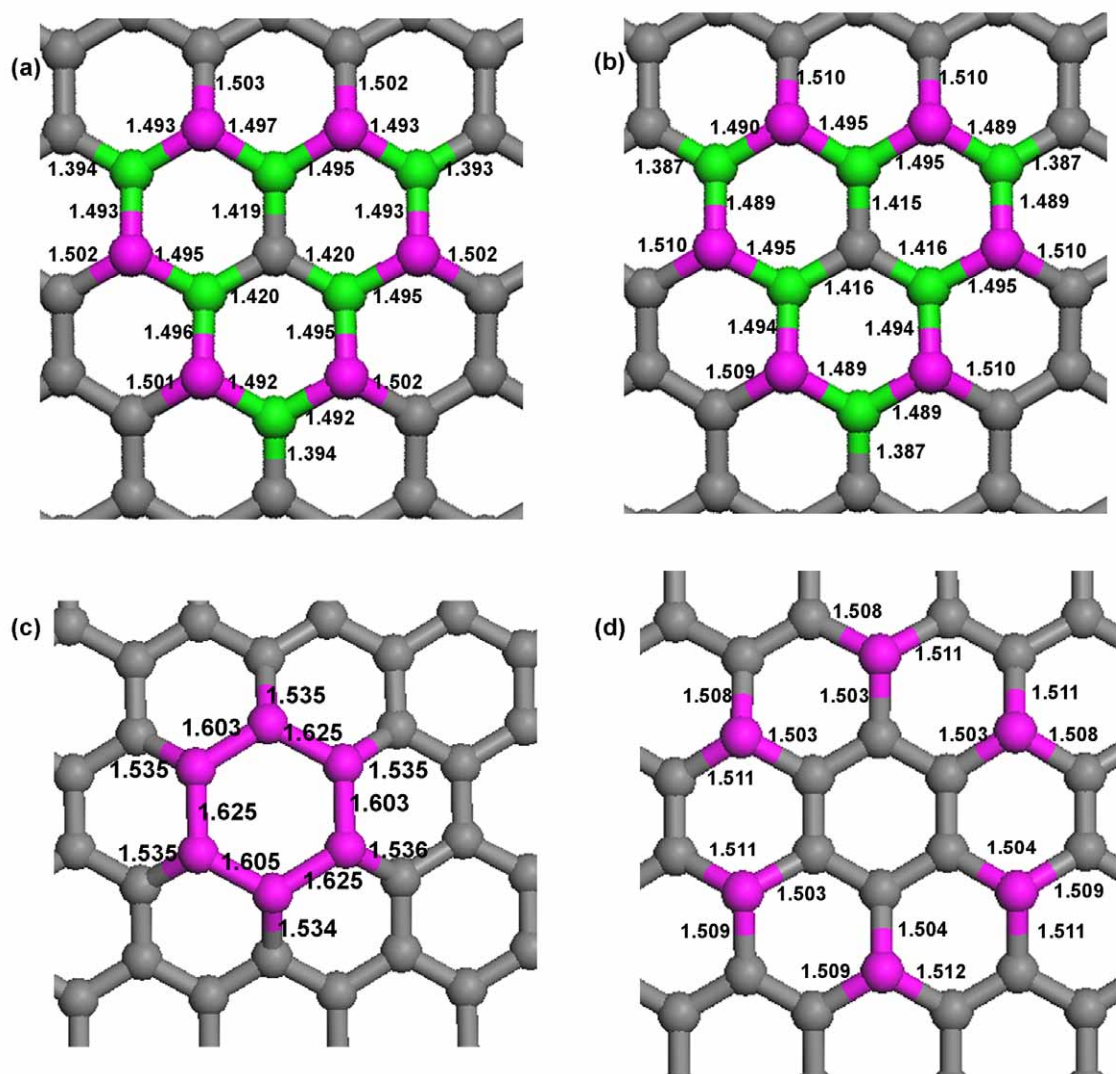

**Fig. S 3** The bond lengths (Å) in Case A-D are marked in (a)-(d), respectively. The pink carbon atoms are denoted as associated positions. The green carbon atoms in (a) and (b) are presented the spin positions.
